# Supplementary material for: Time in Assertive Community Treatment: A Statewide Quality Improvement Initiative to Reduce Length of Participation
Source: Atypon-hosted journal article supplement (doi:10.1176/appi.ps.201700127), 2017-05-15

Table 1

## ACT Transition-Focused Performance Metrics, 2008 and 2014

|                                                                     | 2008        | 2014        |
|---------------------------------------------------------------------|-------------|-------------|
| Median Time in ACT (all ACT episodes through criterion date)*       | 44.4 Months | 32.4 Months |
| Annual ACT Participant Turnover Rate **                             | 24.5%       | 28.2%       |
| Percent of Individuals Leaving ACT Who Met Treatment Objectives *** | 13%         | 25.3%       |
| Post-ACT Ambulatory Follow-Up ****                                  | 50.4%       | 61.2%       |
| Post-ACT Psychiatric Hospitalization *****                          | 14.1%       | 12.8%       |

\* Median time in ACT in ACT was assessed with Kaplan Meier Survival Analysis, using all episodes from the inception of ACT, up to and including the last day of the time period being assessed. (N=8,526 for 2008. N=17,016 in 2014)

\*\* Annual ACT Participant Turnover Rate is calculated as the number of individuals who left ACT within the last 12 months divided by the census on the last day of that year. (1124/4594 in 2008, 1369/4857 in 2014)

\*\*\* Percent of Individuals Leaving ACT who Met Treatment Objectives uses an item in CAIRS that asks providers to select the option that best describes the reason that an individual left ACT. The metric is the percent of individuals who left ACT in the past 12 months for whom "Client substantially met program objectives" is reported. (146/1124 in 2008, 347/1369 in 2014)

\*\*\*\* Post-ACT Ambulatory Follow-up uses data extracted from Medicaid and assesses whether Medicaid-eligible individuals discharged from ACT receive services from an outpatient behavioral health services within 90 days of discharge from ACT. These services include receipt of services at clinic, CDT, IPRT, PROS, ACT, and treatment for a substance use disorder. (318/631 in 2008, 573/936 in 2014)

\*\*\*\*\* Post-ACT Psychiatric Hospitalization refers to hospitalization in a New York City Department of Health (DOH) or NYSOMH licensed hospital or state psychiatric center with a primary mental health diagnosis, within 90 days of discharge from ACT. (89/631 in 2008, 122/938 in 2014)

ACT Performance Metrics - 2008 & 2014

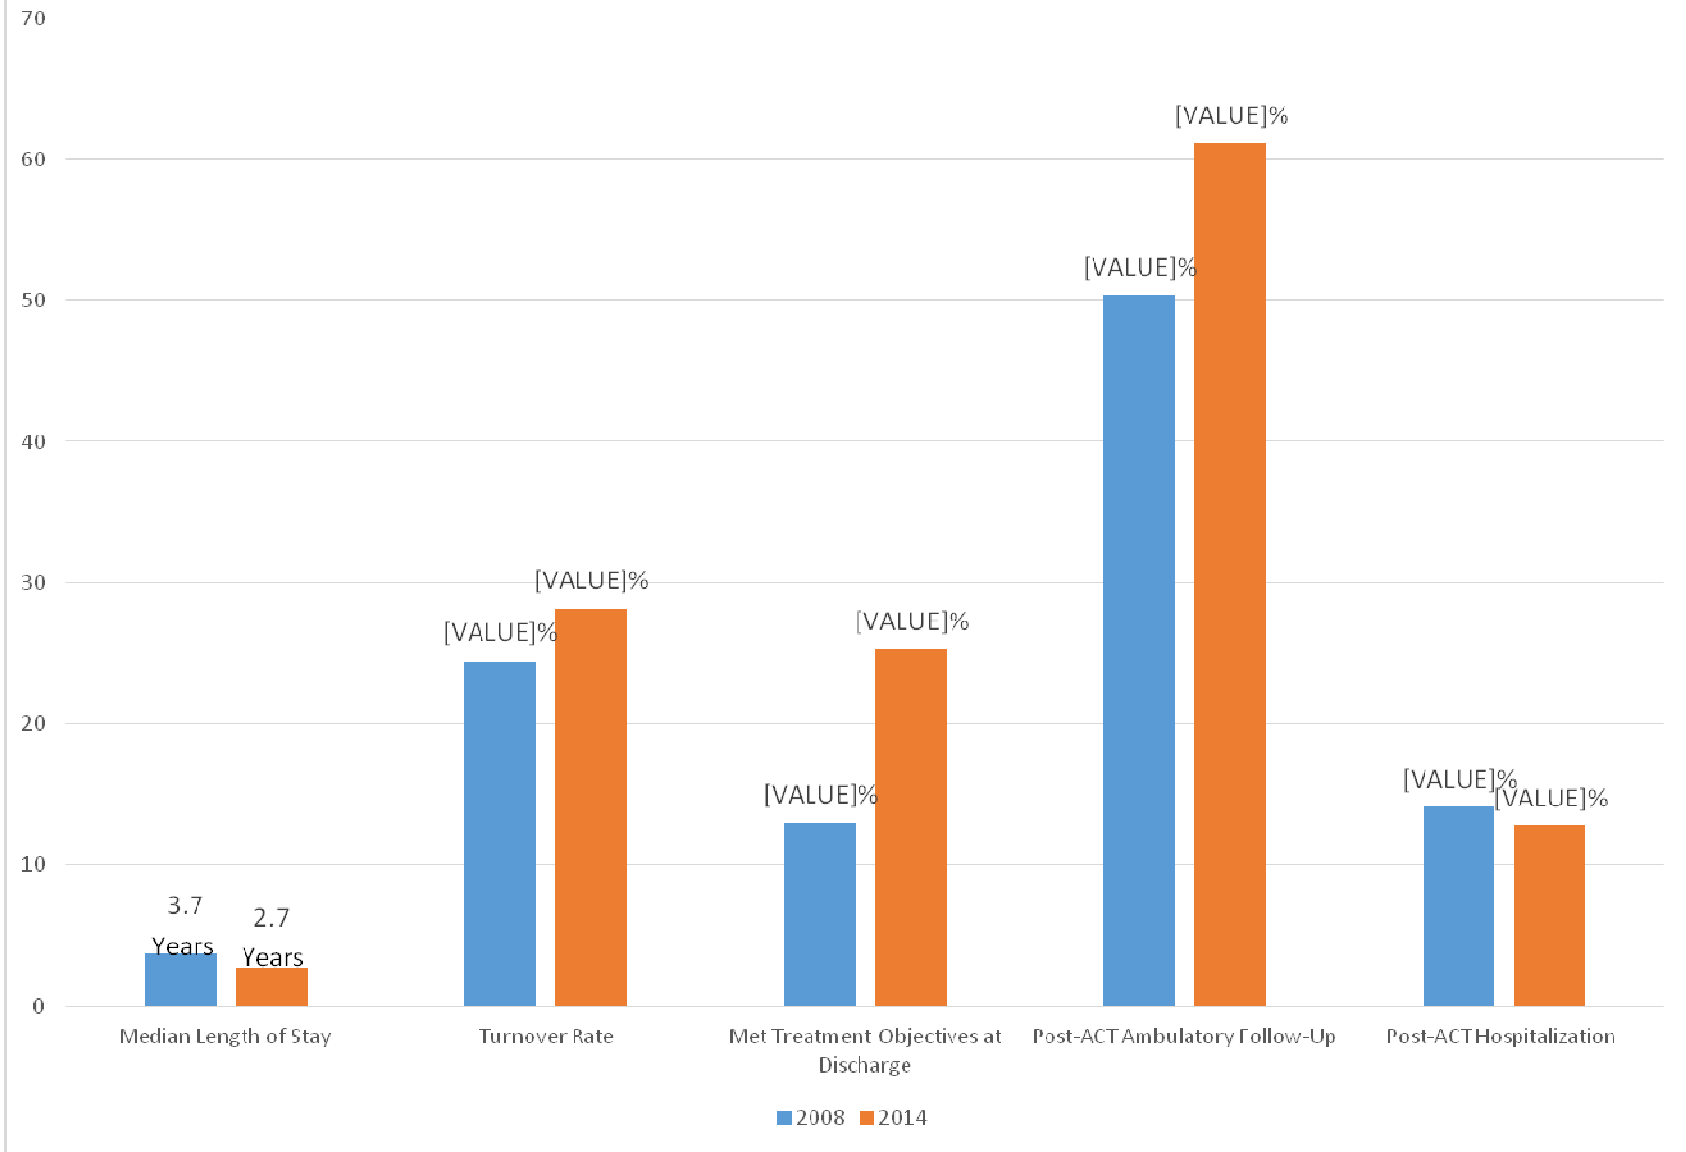

Supplement: appi.ps.201700127.ds001.pdf [file appi.ps.201700127.ds001.pdf]
